# Supplementary material
Source: publisher figshare collection journal article supplement (https://frontiersin.figshare.com/ndownloader/files/27375098)
Supplement: Supplementary file [file 27375098]

Fig. S3

A

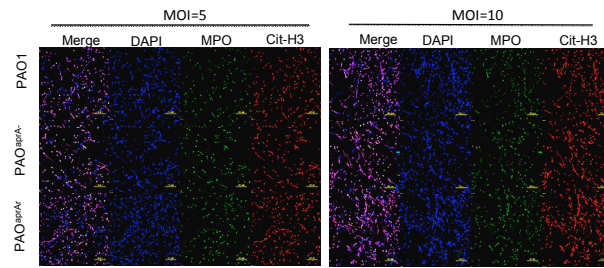

B

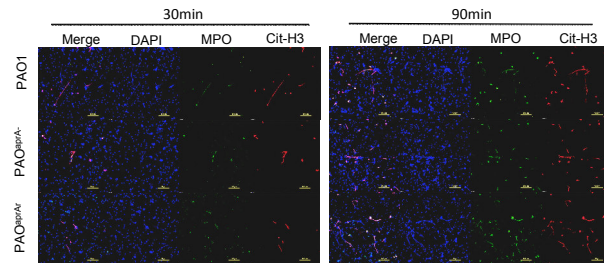

C

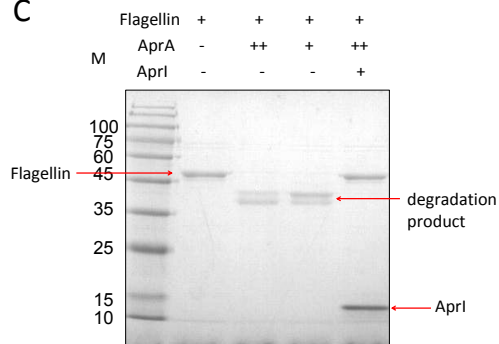

D

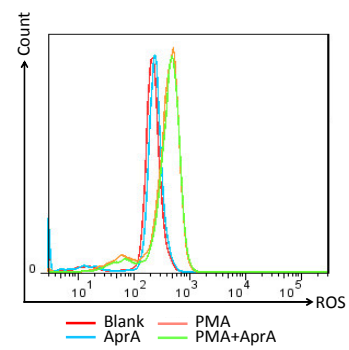

E

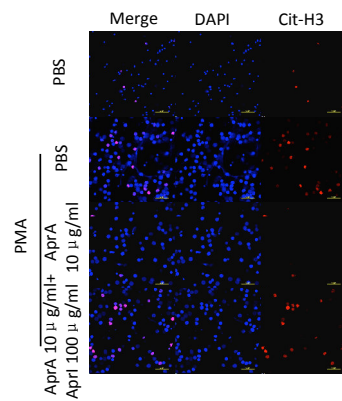

F

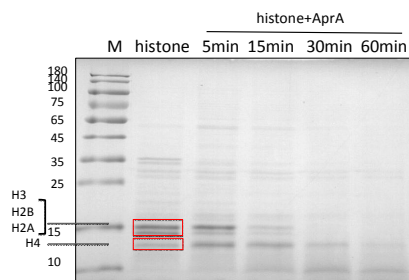

G

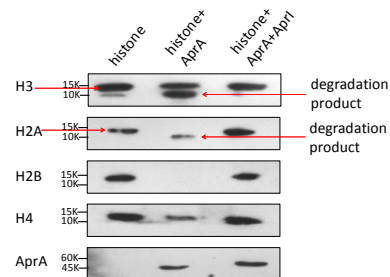

H

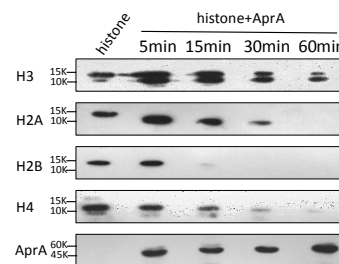

**Fig. S3 AprA degraded NET components but did not inhibit NET formation.**

**(A-B)** Confocal scanning laser microscopic analysis of NET formation. Neutrophils were isolated and stimulated with PAO1, PAO<sup>aprA<sup>-</sup></sup>, or PAO<sup>aprAr</sup> (MOI = 5, 10] for 3 h (A) or with PAO1, PAO<sup>aprA<sup>-</sup></sup>, or PAO<sup>aprAr</sup> (MOI = 50] for 30 min and 90 min (B). Confocal laser microscopy,  $\times 20$ . Scale bars, 100  $\mu$  m. **(C)** AprA was incubated with flagellin in the presence or absence of AprI and analyzed by SDS-PAGE. **(D)** Neutrophils were stimulated with PMA in the presence or absence of AprA. The production of ROS was measured using flow cytometry. **(E)** Neutrophils were stimulated with PMA for 3 h and then incubated with various concentrations of AprA and AprI. NET components were then quantified by immunostaining. Confocal laser microscopy,  $\times 40$ . Scale bars, 50  $\mu$  m. **(F-H)** Histones were extracted from HL-60 cells and incubated with AprA in the presence or absence of AprI. The samples were then analyzed by SDS-PAGE (F) and western blotting (G, H). All data are representative of three independent experiments.
